# Supplementary material for: Phosphorylation of Atg31 is required for autophagy
Source: PubMed Central journal article supplement (PMC4383750; doi:10.1007/s13238-015-0138-4), 2015-03-17
Supplement: 13238_2015_138_MOESM1_ESM.pdf [file 13238_2015_138_MOESM1_ESM.pdf]

Supplemental Table1

| <b>Name</b>   | <b>Genotype</b>                                                          | <b>reference</b> |
|---------------|--------------------------------------------------------------------------|------------------|
| <b>BY4741</b> | <i>MATa his3Δ1 leu2Δ met15Δ ura3Δ</i>                                    | This study       |
| <b>ScLY1</b>  | BY4741, <i>pRS316[GFP-ATG8]</i>                                          | This study       |
| <b>ScLY2</b>  | BY4741, <i>pRS315[GFP-ATG8]</i>                                          | This study       |
| <b>ScLY3</b>  | BY4741, <i>YEPlac181 [Gal1-GST-ATG31]</i>                                | This study       |
| <b>ScLY4</b>  | BY4741, <i>atg31Δ::kanMX6</i>                                            | This study       |
| <b>ScLY5</b>  | BY4741, <i>ATG31-HA::HIS3</i>                                            | This study       |
| <b>ScLY6</b>  | ScLY4, <i>YEPlac181 [Gal1-GST-ATG31]</i>                                 | This study       |
| <b>ScLY7</b>  | ScLY4, <i>YcPlac111 [HA-ATG31]</i>                                       | This study       |
| <b>ScLY8</b>  | ScLY4, <i>YcPlac111 [ATG31], pRS316[GFP-ATG8]</i>                        | This study       |
| <b>ScLY9</b>  | ScLY4, <i>YcPlac111 [ATG31-S174A], pRS316[GFP-ATG8]</i>                  | This study       |
| <b>ScLY10</b> | ScLY4, <i>YcPlac111, pRS316[GFP-ATG8]</i>                                | This study       |
| <b>ScLY11</b> | ScLY4, <i>YEPlac181 [ATG31]</i>                                          | This study       |
| <b>ScLY12</b> | ScLY2, <i>pRS416[ATG9-2XGFP]</i>                                         | This study       |
| <b>ScLY13</b> | ScLY4, <i>YcPlac111 [ATG31], ATG17-GFP::HIS3</i>                         | This study       |
| <b>ScLY14</b> | ScLY4, <i>YcPlac111 [ATG31], ATG29-GFP::HIS3</i>                         | This study       |
| <b>ScLY15</b> | ScLY4, <i>YcPlac111 [ATG31], ATG1-GFP::HIS3</i>                          | This study       |
| <b>ScLY16</b> | ScLY4, <i>ATG17-HA::HIS3, ATG1-MYC::natNT2, YcPlac111 [ATG31]</i>        | This study       |
| <b>ScLY17</b> | ScLY4, <i>ATG17-HA::HIS3, ATG1-MYC::natNT2, YcPlac111[ATG31-S174A]</i>   | This study       |
| <b>ScLY18</b> | ScLY4, <i>ATG17-HA::HIS3, ATG1-MYC::natNT2, YcPlac111</i>                | This study       |
| <b>ScLY19</b> | ScLY4, <i>ATG17-HA::HIS3, ATG29-MYC::natNT2, YcPlac111 [ATG31]</i>       | This study       |
| <b>ScLY20</b> | ScLY4, <i>ATG17-HA::HIS3, ATG29-MYC::natNT2, YcPlac111 [ATG31-S174A]</i> | This study       |
| <b>ScLY21</b> | ScLY4, <i>ATG17-HA::HIS3, ATG29-MYC::natNT2, YcPlac111</i>               | This study       |
| <b>ScLY22</b> | ScLY5, <i>ATG29-MYC::natNT2, pRS316[ATG31-HA]</i>                        | This study       |
| <b>ScLY23</b> | ScLY4, <i>ATG29-MYC::natNT2, pRS316[ATG31-S174A-HA]</i>                  | This study       |
| <b>ScLY24</b> | ScLY4, <i>ATG29-MYC::natNT2, pRS316</i>                                  | This study       |
| <b>ScLY25</b> | ScLY4, <i>ATG17-MYC::natNT2, pRS316[ATG31-HA]</i>                        | This study       |
| <b>ScLY26</b> | ScLY4, <i>ATG17-MYC::natNT2, pRS316[ATG31-HA]</i>                        | This study       |
| <b>ScLY27</b> | BY4741, <i>atg1Δ::kanMX6, YEPlac181 [Gal1-GST-ATG31]</i>                 | This study       |
